# Supplementary material for: Iodine-Biofortified Microgreens as High Nutraceutical Value Component of Space Mission Crew Diets and Candidate for Extraterrestrial Cultivation
Source: MDPI journal article supplement (doi:10.3390/plants12142628), 2023-07-12
Supplement: s1 [file s1]

**Supplementary Table S1.** Pigments and antioxidant activity of four microgreen genotypes grown with three concentrations of iodine in the nutrient solution.

| Treatment                | Total chlorophyll         | $\beta$ -carotene | Lutein          | Total carotenoids | ABTS                                         | DPPH            | FRAP            |
|--------------------------|---------------------------|-------------------|-----------------|-------------------|----------------------------------------------|-----------------|-----------------|
|                          | mg 100 g <sup>-1</sup> fw |                   |                 |                   | mmol Trolox equivalents kg <sup>-1</sup> dw. |                 |                 |
| Species (S)              |                           |                   |                 |                   |                                              |                 |                 |
| Tatsoi                   | 1.20 ± 0.04a              | 139.83 ± 4.33d    | 54.94 ± 2.06c   | 194.77 ± 6.26c    | 93.57 ± 1.18d                                | 94.79 ± 2.18d   | 158.63 ± 3.19d  |
| Coriander                | 1.04 ± 0.04b              | 347.44 ± 12.29a   | 91.72 ± 4.11b   | 439.16 ± 16.11a   | 156.21 ± 1.99a                               | 204.80 ± 9.52c  | 276.91 ± 10.05b |
| Green Basil              | 0.57 ± 0.04c              | 179.72 ± 9.68c    | 84.95 ± 4.43b   | 264.67 ± 14.01b   | 143.49 ± 2.87b                               | 213.59 ± 3.21b  | 281.88 ± 3.07a  |
| Purple Basil             | 0.67 ± 0.03c              | 278.20 ± 3.84b    | 143.45 ± 3.46a  | 421.66 ± 6.57a    | 136.14 ± 2.92c                               | 220.86 ± 3.79a  | 269.41 ± 8.33c  |
|                          | ***                       | ***               | ***             | ***               | ***                                          | ***             | ***             |
| Biofortification (B)     |                           |                   |                 |                   |                                              |                 |                 |
| Control                  | 0.89 ± 0.08               | 240.94 ± 18.84a   | 98.21 ± 10.69a  | 339.15 ± 25.84a   | 124.69 ± 6.58b                               | 167.78 ± 14.59c | 226.66 ± 14.28c |
| 4 $\mu$ M                | 0.88 ± 0.09               | 222.84 ± 25.64b   | 88.03 ± 9.62b   | 310.88 ± 32.99b   | 135.68 ± 7.09a                               | 188.83 ± 15.00b | 251.41 ± 14.78b |
| 8 $\mu$ M                | 0.83 ± 0.08               | 245.11 ± 30.47a   | 95.06 ± 9.68a   | 340.17 ± 37.56a   | 136.69 ± 7.83a                               | 193.92 ± 17.81a | 262.06 ± 18.22a |
|                          | n.s.                      | ***               | ***             | ***               | ***                                          | ***             | ***             |
| S×B                      |                           |                   |                 |                   |                                              |                 |                 |
| Tatsoi × Control         | 1.17 ± 0.06               | 151.11 ± 4.45fg   | 58.73 ± 0.45ef  | 209.84 ± 4.75de   | 89.63 ± 0.68j                                | 88.86 ± 1.37g   | 147.63 ± 1.10j  |
| Tatsoi × 4 $\mu$ M       | 1.29 ± 0.09               | 124.75 ± 2.86g    | 47.10 ± 1.98f   | 171.85 ± 4.83e    | 97.60 ± 0.57h                                | 102.92 ± 1.10f  | 169.32 ± 1.61h  |
| Tatsoi × 8 $\mu$ M       | 1.14 ± 0.04               | 143.62 ± 3.55fg   | 58.99 ± 0.69ef  | 202.61 ± 4.23de   | 93.47 ± 0.06i                                | 92.59 ± 0.85fg  | 158.95 ± 0.56i  |
| Coriander × Control      | 1.10 ± 0.07               | 313.38 ± 4.08bc   | 79.23 ± 1.63d   | 392.61 ± 3.09b    | 149.02 ± 0.17d                               | 168.78 ± 4.59e  | 239.41 ± 3.17g  |
| Coriander × 4 $\mu$ M    | 1.02 ± 0.05               | 337.47 ± 4.92b    | 92.72 ± 4.46cd  | 430.19 ± 9.36b    | 156.94 ± 0.37b                               | 213.79 ± 1.87c  | 283.80 ± 0.78cd |
| Coriander × 8 $\mu$ M    | 1.00 ± 0.10               | 391.47 ± 13.16a   | 103.22 ± 5.97c  | 494.69 ± 18.74a   | 162.68 ± 0.39a                               | 231.82 ± 2.85ab | 307.52 ± 2.59a  |
| Green Basil × Control    | 0.67 ± 0.06               | 218.12 ± 2.43e    | 101.70 ± 3.44c  | 319.82 ± 5.30c    | 133.36 ± 0.26f                               | 202.15 ± 2.05d  | 272.72 ± 1.10e  |
| Green Basil × 4 $\mu$ M  | 0.55 ± 0.05               | 160.61 ± 3.40f    | 77.62 ± 3.05d   | 238.22 ± 6.21d    | 153.12 ± 0.41c                               | 222.64 ± 2.13bc | 292.80 ± 2.90bc |
| Green Basil × 8 $\mu$ M  | 0.48 ± 0.04               | 160.44 ± 1.27f    | 75.54 ± 1.73de  | 235.98 ± 2.71d    | 143.99 ± 0.95e                               | 216.00 ± 2.38c  | 280.13 ± 0.81de |
| Purple Basil × Control   | 0.63 ± 0.06               | 281.17 ± 6.07d    | 153.18 ± 4.74a  | 434.34 ± 10.81b   | 126.74 ± 0.68g                               | 211.33 ± 0.30cd | 246.88 ± 1.17g  |
| Purple Basil × 4 $\mu$ M | 0.66 ± 0.07               | 268.55 ± 7.84d    | 134.69 ± 3.49b  | 403.23 ± 10.55b   | 135.05 ± 0.85f                               | 216.00 ± 0.59c  | 259.72 ± 3.23f  |
| Purple Basil × 8 $\mu$ M | 0.71 ± 0.02               | 284.90 ± 2.30cd   | 142.49 ± 4.78ab | 427.39 ± 4.76b    | 146.63 ± 1.19de                              | 235.26 ± 3.25a  | 301.65 ± 0.76ab |
|                          | n.s.                      | ***               | ***             | ***               | ***                                          | ***             | ***             |

n.s., \*\*\* Non significant or significant at  $p < 0.001$ , respectively. Different letters in each column indicate significant mean differences among the genotypes according to Tukey's HSD test ( $p = 0.05$ ). All data are expressed as mean ± SE,  $n = 3$ .
